# Supplementary material for: CADASIL mutations sensitize the brain to ischemia via spreading depolarizations and abnormal extracellular potassium homeostasis
Source: PubMed Central journal article supplement (PMC9012276; doi:10.1172/jci149759), 2022-04-15
Supplement: jci-132-149759-s061.pdf [file jci-132-149759-s061.pdf]

A

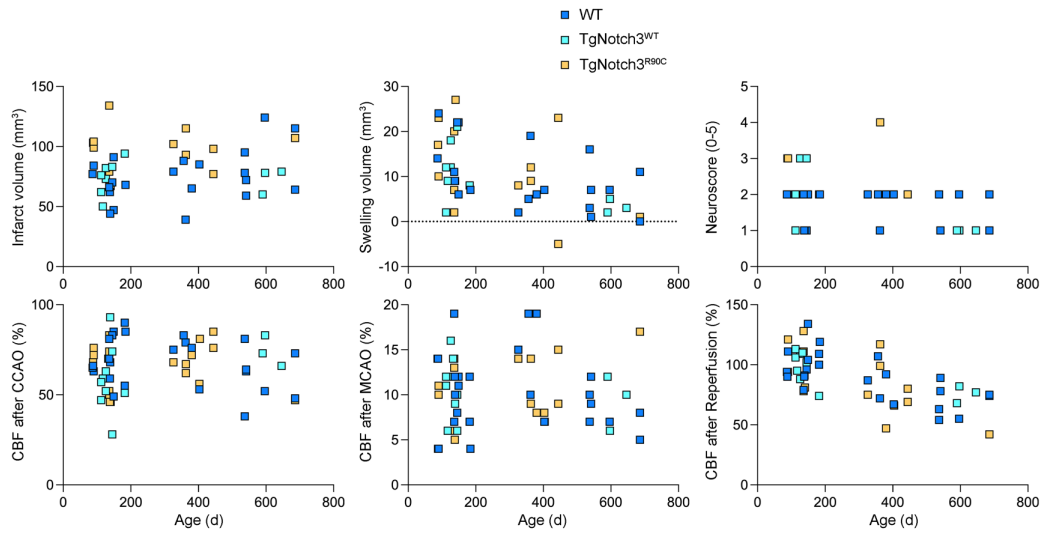

B

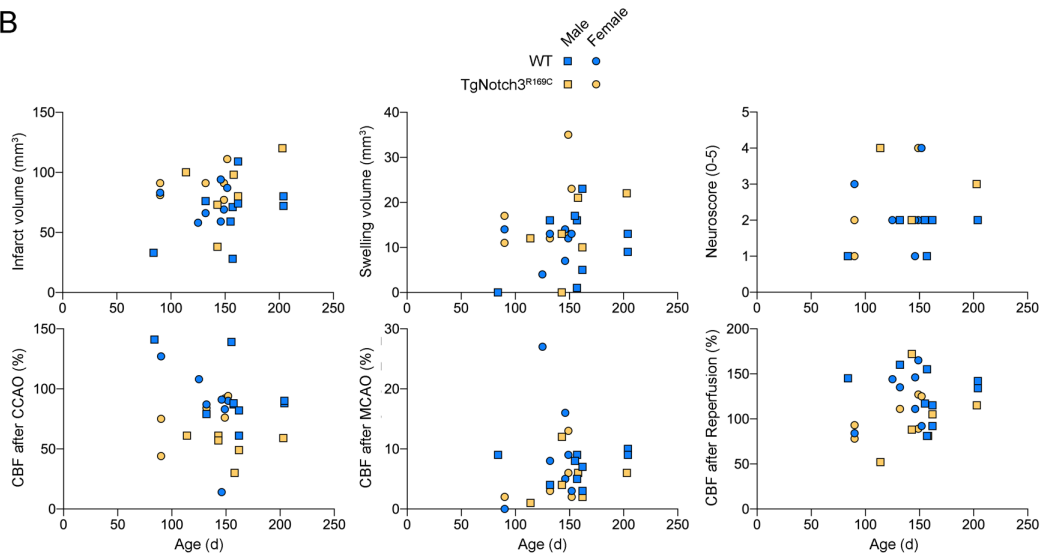

**Supplementary Figure 1.** Distribution of outcomes by age, genotype and sex after different stages of filament middle cerebral artery occlusion (fMCAO) in *Notch3<sup>R90C</sup>* (A) and *Notch3<sup>R169C</sup>* (B) cohorts. Vertical axis labels “CBF CCAO” refers to the CBF after CCA clamping, “CBF MCAO” refers to the CBF drop after filament insertion, and “CBF Reperfusion” refers to CBF after filament removal. Each data point represents one animal.

**Supplementary Table 1. Systemic physiology**

| <b>Experiment</b>                  | <b>Genotype</b>           | <b>pH</b> | <b>pCO<sub>2</sub></b> | <b>pO<sub>2</sub></b> | <b>BP</b> |
|------------------------------------|---------------------------|-----------|------------------------|-----------------------|-----------|
| Distal MCAO<br>Area of CBF deficit | TgNotch3 <sup>WT</sup>    | 7.35±0.05 | 37±7                   | 138±14                | 79±5      |
|                                    | TgNotch3 <sup>R90C</sup>  | 7.35±0.04 | 36±6                   | 143±16                | 83±5      |
|                                    | WT                        | 7.35±0.03 | 29±2                   | 130±22                | 76±6      |
|                                    | TgNotch3 <sup>R169C</sup> | 7.36±0.03 | 29±3                   | 139±30                | 75±5      |
| Peri-infarct SD                    | WT                        | 7.37±0.02 | 37±3                   | 136±27                | 90±4      |
|                                    | TgNotch3 <sup>R90C</sup>  | 7.38±0.02 | 35±4                   | 135±20                | 84±11     |
|                                    | WT                        | 7.35±0.02 | 37±3                   | 111±10                | 91±4      |
|                                    | TgNotch3 <sup>R169C</sup> | 7.35±0.04 | 35±4                   | 106±7                 | 91±8      |

Mean ± standard deviation.
